# Supplementary material for: A selective LIS1 requirement for mitotic spindle assembly discriminates distinct T-cell division mechanisms within the T-cell lineage
Source: eLife journal article supplement (doi:10.7554/elife.80277), 2022-12-15
Supplement: supp [file Figure 1 _ Figure supplement 1 source data 1.xlsx]

## Sheet: Figure 1 S1A
	B cells (numbers)		T cells (numbers)		CD4+ T cells (numbers)		CD8+ T cells (numbers)
Mouse #	Lis1flox/flox	Lis1flox/flox CD2Cre	Lis1flox/flox	Lis1flox/flox CD2Cre	Lis1flox/flox	Lis1flox/flox CD2Cre	Lis1flox/flox	Lis1flox/flox CD2Cre
1	48.1091	8.3712	26.0399	6.7584	14.6963	3.0303	11.4057	3.05902
2	61.9959	6.40297	31.8543	3.15172	19.8261	1.38357	12.4129	1.35252
3	56.0457	5.10959	28.0228	3.12253	16.731	1.21288	10.8208	1.37094
4	38.1274	10.2775	23.3638	2.10772	14.8688	1.84319	8.26045	0.761869
5	48.7612	6.05283	23.0651	1.2048	15.0717	1.35527	8.49813	0.319226
6	56.9443	9.90986	43.0526	2.81085	26.8924	0.984703	15.0774	0.963643
7		9.04966	32.3411	2.4723	18.5961	1.82262	12.8071	0.555245
8			45.416	6.83271	23.7071	3.78532	19.7559	2.25479
9			50.8144	4.13424	26.83	1.91002	21.6469	1.58341
10			43.4642	4.81023	23.8184	2.01549	17.7334	2.03954
11			54.0419	7.92111	31.1281	4.08729	20.0495	2.78031
12				7.29227		5.32336		0.889657

## Sheet: Figure 1 S1B
	DN thymocytes (%)		DP thymocytes (%)		CD4+ SP thymocytes (%)		CD8+ SP thymocytes (%)
Mouse #	Lis1flox/+	Lis1flox/+ CD2Cre	Lis1flox/+	Lis1flox/+ CD2Cre	Lis1flox/+	Lis1flox/+ CD2Cre	Lis1flox/+	Lis1flox/+ CD2Cre
1	5	2.34	84	88	7.5	6.65	2.9	2.34
2	4.58	3.03	81	82	9.11	9.7	4.73	4.54
3	2.06	1.96	86.9	86	6	6.9	2.1	2.6
4	2.26		85		7		2.8
	DN1 thymocytes (%)		DN2 thymocytes (%)		DN3 thymocytes (%)		DN4 thymocytes (%)
Mouse #	Lis1flox/+	Lis1flox/+ CD2Cre	Lis1flox/+	Lis1flox/+ CD2Cre	Lis1flox/+	Lis1flox/+ CD2Cre	Lis1flox/+	Lis1flox/+ CD2Cre
1	4.27	1.92	4	2.83	66	75	25	20
2	3.83	2.18	4.72	4.72	68	71	23	22
3	3.83	2.92	7.12	4.92	65.6	65.6	23.4	26.5
4	3.13		6.12		69.2		21.5

## Sheet: Figure 1 S1C
	Pre-pro B (numbers)		Pro-B (numbers)		Pre-B (numbers)		Immature B cells (numbers)
Mouse #	Lis1flox/flox	Lis1flox/flox CD2Cre	Lis1flox/flox	Lis1flox/flox CD2Cre	Lis1flox/flox	Lis1flox/flox CD2Cre	Lis1flox/flox	Lis1flox/flox CD2Cre
1	0.82921	1.33437	0.653305	0.0411217	6.57632	0.172621	2.46349	0.0660024
2	1.10577	1.0856	0.736971	0.04827	5.86287	0.166339	1.9863	0.0717909
3	1.43934	1.77109	0.823662	0.340127	8.84567	1.18352	2.86922	0.437202
4	1.06472	1.42668	0.644566	0.176998	7.92261	0.48149	3.08671	0.138685
5	0.859851	1.49151	0.409344	0.295024	6.47027	1.17411	2.13313	0.364796
6	1.25468	1.73485	0.628953	0.212251	7.55409	0.322798	2.3917	0.0511075
7	1.02367		0.626044		9.19254		3.59863
