# Supplementary material for: A selective LIS1 requirement for mitotic spindle assembly discriminates distinct T-cell division mechanisms within the T-cell lineage
Source: eLife journal article supplement (doi:10.7554/elife.80277), 2022-12-15
Supplement: supp [file Figure 1 source data 1.xlsx]

## Sheet: Figure 1A
	DN thymocytes (numbers)		DP thymocytes (numbers)		CD4-SP thymocytes (numbers)		CD8-SP thymocytes (numbers)
Mouse #	Lis1flox/flox	Lis1flox/flox CD2Cre	Lis1flox/flox	Lis1flox/flox CD2Cre	Lis1flox/flox	Lis1flox/flox CD2Cre	Lis1flox/flox	Lis1flox/flox CD2Cre
1	2.62482	3.06469	86.2874	0.14129	8.00521	0.0539222	2.25272	0.102043
2	3.36068	2.88046	127.007	0.0709632	10.5767	0.0664474	2.41503	0.151926
3	3.49245	2.42374	149.877	0.09261	15.7424	0.034398	3.21165	0.0526554
4	3.77078	7.08048	171.979	0.322344	15.6816	0.15444	4.50897	0.222552
5	1.336	3.38791	27.5728	0.0151536	1.79713	0.077572	0.49271	0.0678304
6	3.8711	2.66614	95.0281	0.0200032	10.2928	0.0574378	2.24591	0.050008
7	3.04635	4.85503	80.5508	0.32704	7.09258	0.109575	1.57924	0.129805
8	2.91038	3.192	71.7604	0.032832	8.59214	0.253536	2.36306	0.0634752
9	4.75907	2.36454	95.0627	0.220774	13.2922	0.23959	3.28744	0.250253
10	2.36839	2.84953	63.0766	0.375955	9.82803	0.0952186	4.0601	0.149328
11	5.43189	3.89942	106.712	0.145158	10.3245	0.131634	3.69831	0.29302
12	3.06266	2.25697	64.9681	0.172575	9.41088	0.148905	3.26079	0.150556
13	4.32463	5.10295	108.582	0.0484422	13.3066	0.133216	3.92543	0.123308
14	3.69373	2.09983	97.847	0.0554155	13.5763	0.234832	4.84343	0.0643615
15	0.481562	1.73894	121.171	0.0447843	1.1974	0.273075	1.4577	0.0985255
16	0.7683	3.21758	164.495	0.0783073	6.9541	0.395413	13,199: excluded outlier	0.136456

## Sheet: Figure 1B
	DN1 thymocytes (numbers)		DN2 thymocytes (numbers)		DN3 thymocytes (numbers)		DN4 thymocytes (numbers)
Mouse #	Lis1flox/flox	Lis1flox/flox CD2Cre	Lis1flox/flox	Lis1flox/flox CD2Cre	Lis1flox/flox	Lis1flox/flox CD2Cre	Lis1flox/flox	Lis1flox/flox CD2Cre
1	0.0400891	0.0576212	0.0542586	0.281638	0.528762	2.56355	0.241053	0.0382181
2	0.038804	0.0895006	0.0559999	0.250494	0.688969	2.32487	0.347313	0.0217704
3	0.0543032	0.0664625	0.0539786	0.301897	0.388343	1.86095	0.585219	0.0236562
4	0.182944	0.131129	0.163206	0.337802	0.919137	2.55501	1.68214	0.0445285
5	0.112325	0.123592	0.125136	0.300498	0.802972	1.95566	1.24907	0.0421667
6	0.185597	0.162529	0.0686665	0.284883	0.535292	3.86692	1.40404	0.11231
7	0.284347	0.106374	0.230723	0.519436	0.994863	2.06393	2.01795	0.0718369
8	0.0820286	0.0269093	0.147686	0.181638	0.842689	1.69144	0.649681	0.0228729
9	0.171976	0.0220806	0.346403	0.188723	1.31817	1.65888	1.22927	0.0167964
10	0.054196	0.0462976	0.170754	0.287748	0.706775	2.53758	0.553838	0.0489348
11	0.0680566	0.044314	0.549525	0.322106	2.01634	1.57539	1.59362	0.0103465
12	0.0604804	0.0790005	0.235579	0.659209	0.745245	1.86253	1.2232	0.0133411
13	0.10819	0.043656	0.331912	0.597586	1.24786	2.91994	1.50318	0.0186075
14	0.0547073	0.0478758	0.343164	0.531059	0.862884	1.41817	1.22594	0.0144834
15	0.0532565	0.079519	0.149363	0.556633	0.881487	3.75065	0.446865	0.0304823
16	0.0669072	0.0814892	0.501804	0.898939	1.74138	2.65297	0.675046	0.023387
17	0.07336	0.0811031	0.30626	0.523523	1.48382	3.66037	0.510434	0.0248888
18	0.0212776	0.0383239	0.0517867	0.325417	0.717134	2.96842	0.335488	0.0285748
19	0.0143475	0.0530376	0.0825814	0.742526	1.14947	4.18744	0.422083	0.0646553
20	0.0369662	0.0144514	0.0978995	0.190758	1.35678	1.21969	0.540275	0.0205209
21		0.0758981		0.470026		4.74363		0.133364
22		0.0537731		0.215491		3.66055		0.0537731
23		0.058464		0.154022		3.74169		0.0794303

## Sheet: Figure 1C
	% TCRbetahi CD27hi in DN3
Mouse #	Lis1flox/flox	Lis1flox/flox CD2Cre
1	12	9
2	12	8
3	18	5.5
4	23	11.5
5	26	8

## Sheet: Figure 1D
	% TCRbetahi CD5hi		MFI TCRbeta		MFI CD5
Mouse #	Lis1flox/flox	Lis1flox/flox CD2Cre	Lis1flox/flox	Lis1flox/flox CD2Cre	Lis1flox/flox	Lis1flox/flox CD2Cre
1	9.08	7.39	3736	3702	1685	2187
2	12.2	5.97	3422	3468	1846	3007
3	9.83	4.25	3654	3205	1841	2634
4	9.2	4.46	2356	2751	1879	2376
5	8.54	4.44	2515	2343	1878	2457
6	7.94	6.47	2384	2748	1862	2604

## Sheet: Figure 1E
	MFI FSC		MFI CD71		MFI IL-7R
Mouse #	Lis1flox/flox	Lis1flox/flox CD2Cre	Lis1flox/flox	Lis1flox/flox CD2Cre	Lis1flox/flox	Lis1flox/flox CD2Cre
1	135892	140709	1430	2095	1319	1446
2	133870	142847	1328	1950	1404	1365
3	136996	141166	1380	1761	1545	1416
4	140406	145791	1742	2065	730	1418
5	142954	142656	2148	2404	911	1176
6	133669	147529	2163	1962	780	1101

## Sheet: Figure 1F
	G2/M (%)
Mouse #	Lis1flox/flox	Lis1flox/flox CD2Cre
1	10.9	24.4
2	11.2	26.1
3	10.8	22
