# Supplementary material for: A selective LIS1 requirement for mitotic spindle assembly discriminates distinct T-cell division mechanisms within the T-cell lineage
Source: eLife journal article supplement (doi:10.7554/elife.80277), 2022-12-15
Supplement: supp [file Figure 2 source data 1.xlsx]

## Sheet: Figure 2A
	Proliferation (%)
	24 hours		48 hours (%)		72 hours (%)
Mouse #	Lis1flox/flox	Lis1flox/flox CD2Cre	Lis1flox/flox	Lis1flox/flox CD2Cre	Lis1flox/flox	Lis1flox/flox CD2Cre
1	1.86	1.48	34.4	4.38	93	9.73
2	19.6	11.3	55.3	35.4	96.6	56.3
3	5.91	5.78	46.4	11.4	95.9	31.6
4	2.88	4.36	78.8	25.1
5	6.58	6.49	45.4	33
6	19.2	18.1	39	5.2
7	3.64	3.84	11.4	28.5

## Sheet: Figure 2C
	TCRbetahi CD5hi (%)		MFI IC TCRbeta		MFI CD5
Mouse #	Lis1flox/flox	Lis1flox/flox CD2Cre	Lis1flox/flox	Lis1flox/flox CD2Cre	Lis1flox/flox	Lis1flox/flox CD2Cre
1	14.5	12.2	9621	10651	2272	2599
2	9.57	7.16	4941	4766	1649	1860
3	14	10.5	6572	4916	2224	2311
4	6.31	4.01	7838	7250	1479	1511

## Sheet: Figure 2D
	CD71hiCD5hi (%)
Mouse #	Lis1flox/flox	Lis1flox/flox CD2Cre
1	6.2	9.5
2	20	30
3	6.84	12.4
4	18	16

## Sheet: Figure 2E
	MFI Bcl2
	TCRbeta-lo CD5-lo		TCRbeta-hi CD5-hi
Mouse #	Lis1flox/flox	Lis1flox/flox CD2Cre	Lis1flox/flox	Lis1flox/flox CD2Cre
1	1179	1054	2178	1501
2	2310	2069	4044	3779
3	806	784	1071	984

## Sheet: Figure 2F
	G2/M (%)
Mouse #	Lis1flox/flox	Lis1flox/flox CD2Cre
1	11	19.6
2	18.7	32.9
3	9.99	35.5
4	20.5	29.3
5	12.8	24.8
6	11.8	16.6
7	11.3	21.4
