# Supplementary material for: A selective LIS1 requirement for mitotic spindle assembly discriminates distinct T-cell division mechanisms within the T-cell lineage
Source: eLife journal article supplement (doi:10.7554/elife.80277), 2022-12-15
Supplement: supp [file Figure 3 _ Figure supplement 1 source data 1.xlsx]

## Sheet: Figure 3 S1A
	DN thymocytes (numbers)		DP thymocytes (numbers)		CD4-SP thymocytes (numbers)		CD8-SP thymocytes (numbers)
Mouse #	Lis1flox/flox	Lis1flox/flox CD4Cre	Lis1flox/flox	Lis1flox/flox CD4Cre	Lis1flox/flox	Lis1flox/flox CD4Cre	Lis1flox/flox	Lis1flox/flox CD4Cre
1	2.22157	2.87647	106.61	136.476	12.3117	13.8977	3.00346	3.0797
2	1.99865	2.99314	94.9358	118.242	11.4367	10.9209	2.68707	2.64259
3	2.371	2.00912	106.142	86.1348	10.9828	11.8487	3.32924	2.96732
4	2.53539	4.74445	108.177	143.16	14.8223	14.1176	4.38167	3.22358
5	2.1072		104.374		12.6925		4.06652

## Sheet: Figure 3 S1B
	Cell numbers TCRbeta-hi CD24-lo (x10exp6)
	CD4+ SP thymocytes		CD8+ SP thymocytes
Mouse #	Lis1flox/flox	Lis1flox/flox CD4Cre	Lis1flox/flox	Lis1flox/flox CD4Cre
1	4.06286	3.15479	1.07224	0.545107
2	2.64188	2.71931	0.456802	0.536446
3	3.62432	3.93376	1.15524	0.949543
4	5.75104	3.98118	1.63436	0.699518
5	4.82314		1.35009

## Sheet: Figure 3 S1C
	DN thymocytes (numbers x10exp6)		DP thymocytes (numbers x10exp6)		CD4-SP thymocytes (numbers x10exp6)
Mouse #	Lis1flox/flox	Lis1flox/flox CD4Cre	Lis1flox/flox	Lis1flox/flox CD4Cre	Lis1flox/flox	Lis1flox/flox CD4Cre
1	9.69984	6.9408	115.661	66.096	94.6944	62.928
2	11.2042	8.3655	98.9106	75.075	92.133	100.815
3	9.53064	10.6295	50.508	82.4442	79.3488	84.8856
4	3.549	2.12976	16.38	12.96	33.2514	27.3024
5	5.0028	4.46976	26.796	18.0288	32.868	33.4656
6	4.41	5.568	27.468	33.234	50.82	46.371
7		6.97734		38.5506		57.6666

## Sheet: Figure 3 S1D
	B cells (numbers x10exp6)		T cells (numbers x10exp6)		CD4+ T cells (numbers x10exp6)		CD8+ T cells (numbers x10exp6)
Mouse #	Lis1flox/flox	Lis1flox/flox CD2Cre	Lis1flox/flox	Lis1flox/flox CD2Cre	Lis1flox/flox	Lis1flox/flox CD2Cre	Lis1flox/flox	Lis1flox/flox CD2Cre
1	48.1091	8.3712	26.0399	6.7584	14.6963	3.0303	11.4057	3.05902
2	61.9959	6.40297	31.8543	3.15172	19.8261	1.38357	12.4129	1.35252
3	56.0457	5.10959	28.0228	3.12253	16.731	1.21288	10.8208	1.37094
4	38.1274	10.2775	23.3638	2.10772	14.8688	1.84319	8.26045	0.761869
5	48.7612	6.05283	23.0651	1.2048	15.0717	1.35527	8.49813	0.319226
6	56.9443	9.90986	43.0526	2.81085	26.8924	0.984703	15.0774	0.963643
7		9.04966	32.3411	2.4723	18.5961	1.82262	12.8071	0.555245
8			45.416	6.83271	23.7071	3.78532	19.7559	2.25479
9			50.8144	4.13424	26.83	1.91002	21.6469	1.58341
10			43.4642	4.81023	23.8184	2.01549	17.7334	2.03954
11			54.0419	7.92111	31.1281	4.08729	20.0495	2.78031
12				7.29227		5.32336		0.889657

## Sheet: Figure 3 S1E
	CD4+ T cells (numbers x10exp6)		CD8+ T cells (numbers x10exp6)
Mouse #	Lis1flox/+	Lis1flox/+ CD2Cre	Lis1flox/+	Lis1flox/+ CD2Cre
1	10.2	17.214	8.38	2.1546
2	10.681	12.876	9.592	1.2358
3	15.494	13.081	11.4558	9.7663
4	10.7632	13.416	8.0476	10.7715
5	13.761	11.232	9.7119	11.96
6	18.45	7.7794	14.637	7.178
7	12.201	15.038	10.707	13.8554
8	13.542		11.322
