# Supplementary material for: A selective LIS1 requirement for mitotic spindle assembly discriminates distinct T-cell division mechanisms within the T-cell lineage
Source: eLife journal article supplement (doi:10.7554/elife.80277), 2022-12-15
Supplement: supp [file Figure 3 source data 1.xlsx]

## Sheet: Figure 3A
	Anti-CD3 + anti-CD28 stimulation
	Proliferation ('%)
	Total		Division 1		Division 2		Division 3
Mouse #	Lis1flox/flox	Lis1flox/flox CD4Cre	Lis1flox/flox	Lis1flox/flox CD4Cre	Lis1flox/flox	Lis1flox/flox CD4Cre	Lis1flox/flox	Lis1flox/flox CD4Cre
1	89.4	62.2	25.1	39.5	39.8	15.8	22.5	6.71
2	91	42.4	19.4	37	37.7	5.2	30	1.58
3	94	53.9	16.2	41.4	39.9	5.78	33.6	3.26
4	67.1	15.5	43.3	15.4	22.2	3.58	1.75	1.3
5	79.5	47.5	42.5	33.8	32.6	11.4	4.22	3.12
6	85.7	55.1	33.8	39.4	44.3	10.5	7.48	3.42
7	95.9	65.3	15	38.5	40.5	15.8	35.8	7.19
8	92.9	68.1	17.6	39.9	41.8	16.8	29.5	7.36
9	90.7	67.1	23.2	45.2	39.4	10.6	24.9	6.4
10	93.5	74.8	23.2	54.9	46.8	11.7	20.6	7.09
11	89	52.6	21.8	33.3	39.7	15.5	23.8	4.16
12	89.3	36.5	24.8	30.7	41.8	6.29	18.8	2.25
13	94.5	40.7	18.8	36.2	38.4	5.04	29.3	2.7
14	94.8	32.2	22.8	23.8	40	7.7	27.2	1.54
15	85.7	28.3	33	18.1	38.3	6.32	12.9	1.98
16		37.7		28.1		9.1		2.22
17		45.1		31.6		8.39		2.08
	PMA + ionomycine stimulation
	Proliferation ('%)
	Total		Division 1		Division 2		Division 3
Mouse #	Lis1flox/flox	Lis1flox/flox CD4Cre	Lis1flox/flox	Lis1flox/flox CD4Cre	Lis1flox/flox	Lis1flox/flox CD4Cre	Lis1flox/flox	Lis1flox/flox CD4Cre
1	83.9	60.9	24.2	37.8	44.6	14.7	14.2	5.92
2	82.8	46.5	21.3	38.7	43.9	7.69	16.5	0.87
3	91.8	49.8	19.3	39.2	47.3	7.05	23	2.48
4	97.1	52.4	22.1	16	39.4	7.82	13.7	1.9
5	97.2	45.4	22.3	10.7	40.3	4.5	16.2	0.43
6	93.5	25.5	22.1	7.7	28.1	1.83	8.86	0.38
7	76.4	16.3	9.79	5.44	41.8	1.29	36.7	0.15
8	79.9	9.67	10.2	33.6	44.3	10.8	36.4	4.91
9	60	7.17	15.7	32.4	44.6	8.19	28.4	2.63

## Sheet: Figure 3B
	CD25+ CD69+ (%)
Mouse #	Lis1flox/flox	Lis1flox/flox CD4Cre
1	84.3	79.3
2	80.7	67.9
3	80.3	64.8

## Sheet: Figure 3C
	G2/M (%)
	CD4+ T cells		CD8+ T cells
Mouse #	Lis1flox/flox	Lis1flox/flox CD4Cre	Lis1flox/flox	Lis1flox/flox CD4Cre
1	20.4	29.4	19.9	27.2
2	19.6	28.8	20.8	24
3	18.9	27.9	22.1	22.5
4	17.5	25.4	22.3	25.6
5	12.2	27	25.1	25
6	14.1	15.6	22.8	27.1
7			25.3	23.2
8			24.5	22.9

## Sheet: Figure 3D
	Anti-CD3 + anti-CD28 stimulation
	Proliferation ('%)
	Total		Division 1		Division 2		Division 3
Mouse #	Lis1flox/flox	Lis1flox/flox CD4Cre	Lis1flox/flox	Lis1flox/flox CD4Cre	Lis1flox/flox	Lis1flox/flox CD4Cre	Lis1flox/flox	Lis1flox/flox CD4Cre
1	75.8	71.7	17	12.6	33.7	17.4	22	31.3
2	77.7	46.7	16.8	24.5	34.1	10.6	24.1	9.5
3	85.2	66.7	10.8	18.3	31.5	16.4	37.3	22.8
4	88.1	69.5	14.7	24.1	28	25.5	18.6	7.78
5	86.7	71.6	20.2	23.1	30	34.2	11.6	13.8
6	90.3	57.8	20.2	26.6	27.8	13.9	7.2	3.21
7	63.1	74.3	8.92	26.2	25.5	20	37.2	15.7
8	62.6	43	11	28.1	27.7	24.2	37.2	16.5
9	56.2		12		34.2		37.5
	PMA + ionomycine stimulation
	Proliferation ('%)
	Total		Division 1		Division 2		Division 3
Mouse #	Lis1flox/flox	Lis1flox/flox CD4Cre	Lis1flox/flox	Lis1flox/flox CD4Cre	Lis1flox/flox	Lis1flox/flox CD4Cre	Lis1flox/flox	Lis1flox/flox CD4Cre
1	80.8	42.3	31.1	22.6	39.8	14.4	8.89	4.08
2	83.4	60.3	36.2	43	39	12.6	7.01	4.01
3	91.6	45.6	28.5	27.5	49.2	10.1	13	5.94
4	98.5	43.3	8.16	23.1	39.8	13.2	43.7	5.19
5	98	11.5	4.07	8.09	30.1	3.33	51.7	0.91
6	95.4		17.6		44		28.8

## Sheet: Figure 3E
	CTVlow (%)
	Day 2		Day 3
Mouse #	Lis1flox/flox	Lis1flox/flox CD4Cre	Lis1flox/flox	Lis1flox/flox CD4Cre
1	9.92	0	91.6	11.8
2	5.97	0	91.1	5.6
3	1.96	4.35	96	9.43
4	1.41	4.38	92	9.65
5	10.7	2.79	91.4	13.6
	CD45.1+ (numbers x10exp6) (x106)
	Day 2		Day 3
Mouse #	Lis1flox/flox	Lis1flox/flox CD4Cre	Lis1flox/flox	Lis1flox/flox CD4Cre
1	0.708624	0.651087	1.62852	0.27552
2	0.59886	0.72168	2.03056	0.38222
3	0.7076	0.5616	2.33211	0.4508
4	0.62814	0.7995	1.1089	0.2636
5	0.697824	0.587809	1.27494	0.45764
