# Supplementary material for: A selective LIS1 requirement for mitotic spindle assembly discriminates distinct T-cell division mechanisms within the T-cell lineage
Source: eLife journal article supplement (doi:10.7554/elife.80277), 2022-12-15
Supplement: supp [file Figure 4 source data 1.xlsx]

## Sheet: Figure 4A
	Mitosis in G2/M (%)
Mouse #	Lis1flox/flox	Lis1flox/flox CD4Cre
1	17	27
2	4.4	27.8
3	6.7	29

## Sheet: Figure 4B
	Metaphases in mitosis (%)
Mouse #	Lis1flox/flox	Lis1flox/flox CD4Cre
1	46	26
2	50.5	11.3
3	54.6	16.3

## Sheet: Figure 4C
	Time of mitosis (h)
Cell #	Lis1flox/flox	Lis1flox/flox CD4Cre
1	0.332	2.6975
2	0.4565	1.7015
3	0.4565	1.4525
4	0.332	1.826
5	0.415	1.66
6	0.4565	2.2825
7	0.415	1.7845
8	0.4565	3.8595
9	0.2905	1.826
10	0.4565	1.7015
11	0.332	1.743
12	0.2905	1.411
13	0.331722	2.1165
15	0.290222	2.1165
16	0.4565	1.5355
17	0.3735	1.1205
18	0.498	2.0335
19	0.332	2.4485
20	0.415	1.8675
21	0.6225	1.328
22	0.5395	1.826
23	0.415	2.407
24	0.4565	1.743
25	0.415	0.332
26	0.3735	1.7845
27	0.42194	1.5355
28	0.332	1.079
29	0.332	2.4485
30	0.2905	2.1995
31	0.3735	1.8675
32	0.415	1.66
33	0.415	1.66
34	0.332	1.577
35	0.415	2.1995
36	0.332	1.411
37	0.9545	1.245
38	0.415	1.5355
39	0.415	1.992
40	0.4565	1.3695
41	0.3735	1.6185
42	1.5355	1.7015
43	0.415	2.1995
44	0.332	1.6185
45	0.61625	2.53755
46	0.483333	1.77625
47	1.63125	2.34417
48	0.39875	2.755
49	0.5075	1.35333
50	0.821667	1.78833
51	0.640417	2.81542
52	0.894167	3.12958
53	1.18417	2.74292
54	0.495417	2.22333
55	0.410833	2.81542
56	0.4667	2.48917
57	0.5075	2.28375
58	0.68875	2.88792
59	0.597917	0.833333
60	1.05917	2.12667
61	0.700417	3.1775
62	0.7175	2.83583
63	0.683333	2.08417
64	0.46125	3.29708
65	0.87125	2.22083
66	0.700417	2.66458
67	0.751667	1.79375
68	0.802917	2.1525
69		3.12625
70		3.075

## Sheet: Figure 4D
	%
	Lis1flox/flox	Lis1flox/flox CD4Cre
Effective mitosis	90.3226	21.875
Aborted mitosis	6.45161	42.1875
Mitosis with unequal DNA partitioning	0	29.6875
Mitosis leading to cell death	3.22581	6.25

## Sheet: Figure 4E
	Multilobed nuclei (%)
Mouse #	Lis1flox/flox	Lis1flox/flox CD4Cre
1	2.5	16
2	0.7	20
3	1.4	21.7
