# Supplementary material for: A selective LIS1 requirement for mitotic spindle assembly discriminates distinct T-cell division mechanisms within the T-cell lineage
Source: eLife journal article supplement (doi:10.7554/elife.80277), 2022-12-15
Supplement: supp [file Figure 6 source data 1.xlsx]

## Sheet: Figure 6A
CD4+ T cells (CTVhi FSClo)
	% cells
	Lis1flox/flox	Lis1flox/flox CD4Cre
n = 1 centrosome	91	90
n > 2 centrosomes	9	6
CD4+ T cells (CTVhi FSChi)
	% cells
	Lis1flox/flox	Lis1flox/flox CD4Cre
n = 1 centrosome	97	43
n > 2 centrosomes	3	57

## Sheet: Figure 6B
		PCM size (µm)				PCM size (µm)
		Lis1flox/flox				Lis1flox/flox CD4Cre
Cell #	Centosome #	n =2 centrosomes		Cell #	Centosome #	n =2 centrosomes	n > 2 centrosomes
1	1	1.265		1	1	0.907
	2	1.518			2	1.04
2	1	1.1		2	1	0.965
	2	1.05			2	0.797
3	1	1.04		3	1	0.983
	2	0.993			2	0.999
4	1	1.07		4	1	1.115
	2	1.1			2	1.161
5	1	0.914		5	1	1.073
	2	1.005			2	1.184
6	1	1.220		6	1	1.073
	2	1.34			2	1.184
7	1	1.36		7	1	0.821
	2	1.24			2	1.03
8	1	0.797		8	1	0.943
	2	0.934			2	0.693
9	1	1.457		9	1		0.999
	2	1.509			2		0.331
10	1	1.294			3		0.390
	2	1.213			4		0.344
11	1	1.03		10	1		0.565
	2	0.928			2		0.882
					3		0.393
				11	1		0.718
					2		0.740
					3		0.494
					4		0.401
				12	1		0.866
					2		0.398
					3		0.322
					4		0.383
				13	1		1.381
					2		1.073
					3		0.596
					4		0.431
					5		0.55
				14	1		1.149
					2		1.01
					3		0.646
					4		0.915
					5		0.335
					6		0.422
				15	1		0.698
					2		0.433
					3		0.503
					4		0.464
				16	1		0.895
					2		0.659
					3		0.585
					4		0.9
				17	1		0.9
					2		0.56
					3		0.45
				18	1		0.77
					2		0.43
					3		0.56
					4		0.53
				19	1		0.698
					2		0.814
					3		0.691
					4		0.928
				20	1		1
					2		0.6
					3		0.66
				21	1		0.8
					2		0.88
					3		0.64
				22	1		1.08
					2		1.15
					3		0.499

## Sheet: Figure 6C
DN3 thymocytes (CD5hi)
	% cells
	Lis1flox/flox	Lis1flox/flox CD4Cre
n = 1 centrosome	83	16
n > 2 centrosomes	17	78
