# Supplementary figures and images for: A selective LIS1 requirement for mitotic spindle assembly discriminates distinct T-cell division mechanisms within the T-cell lineage
Source: eLife journal article supplement (doi:10.7554/elife.80277), 2022-12-15

Figure 1 - Figure Supplement 1

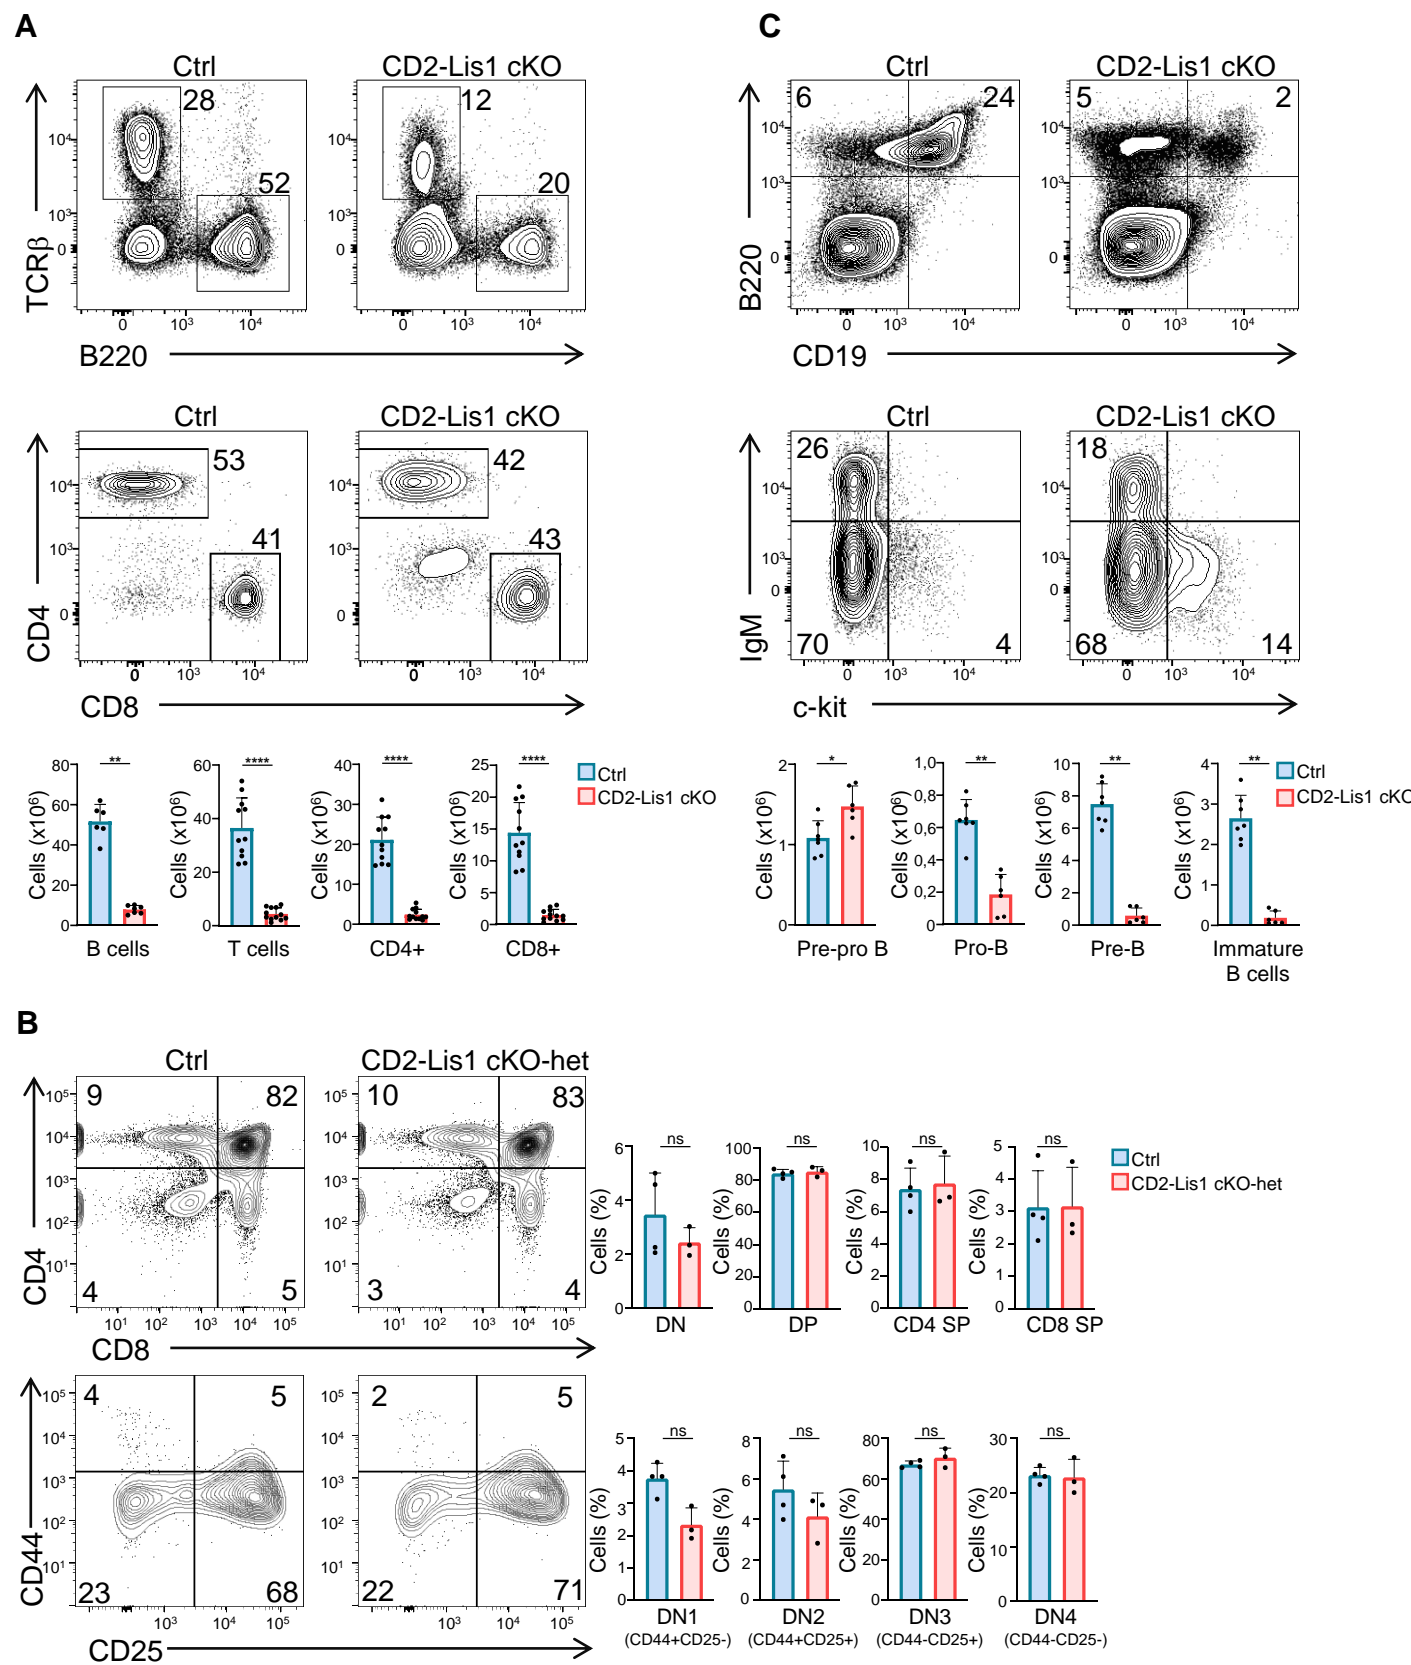

Supplement: supp [file elife_poa_e80277_Figure_1_figure_supplement_1.pdf › elife_poa_e80277_Figure_1_figure_supplement_1.pdf]

**Figure 3 - Figure Supplement 1**

**A**

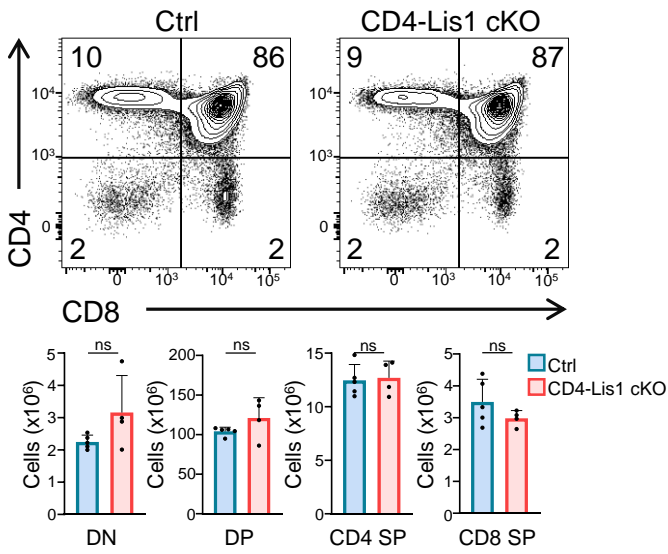

**B**

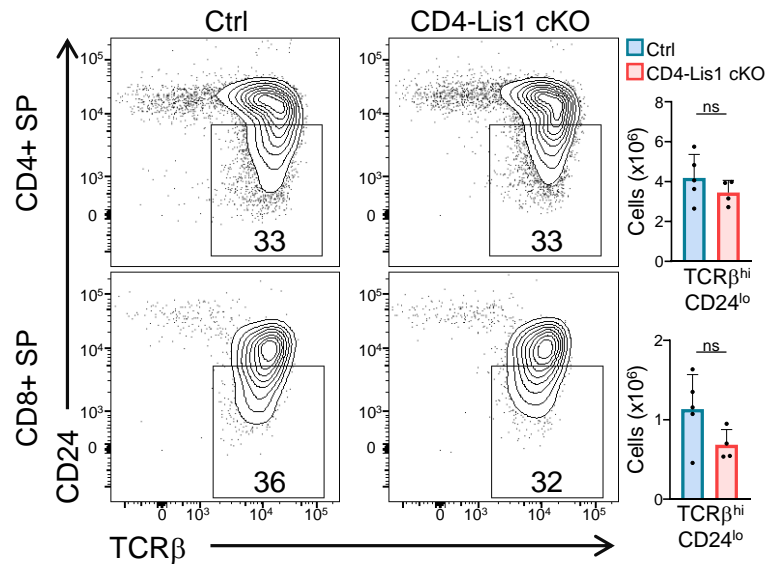

**C**

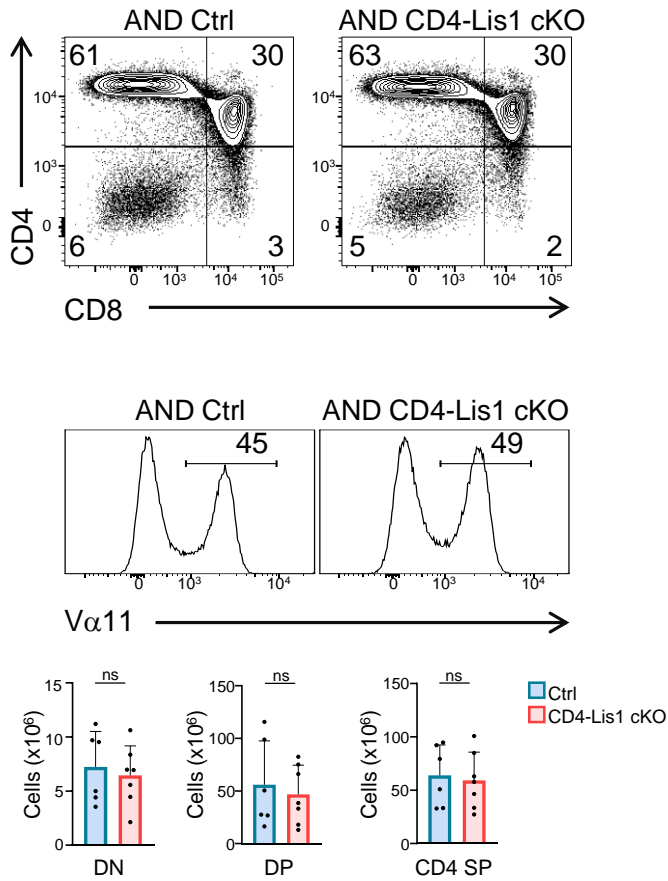

**D**

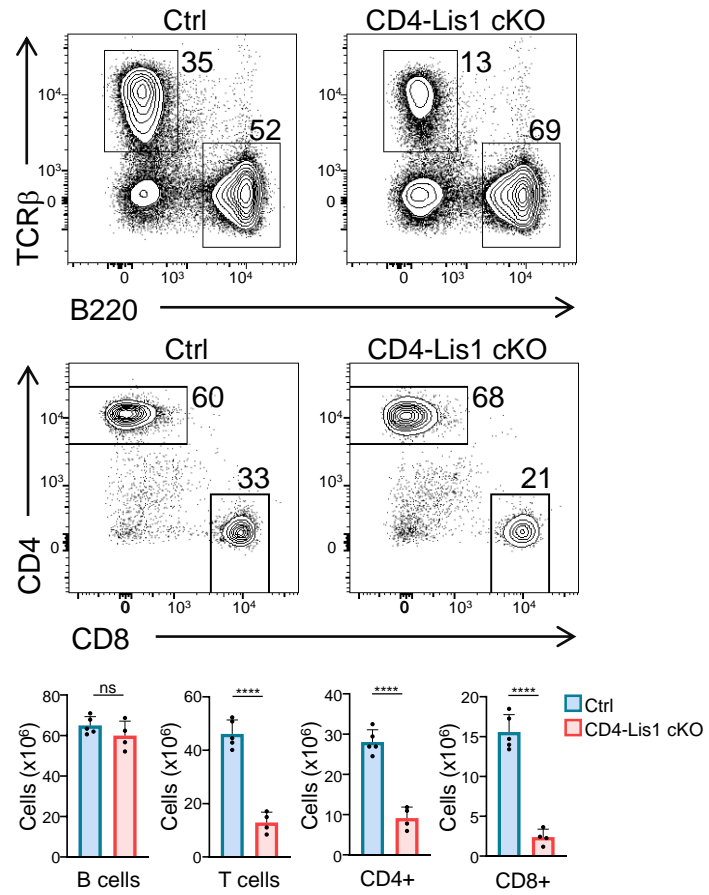

**E**

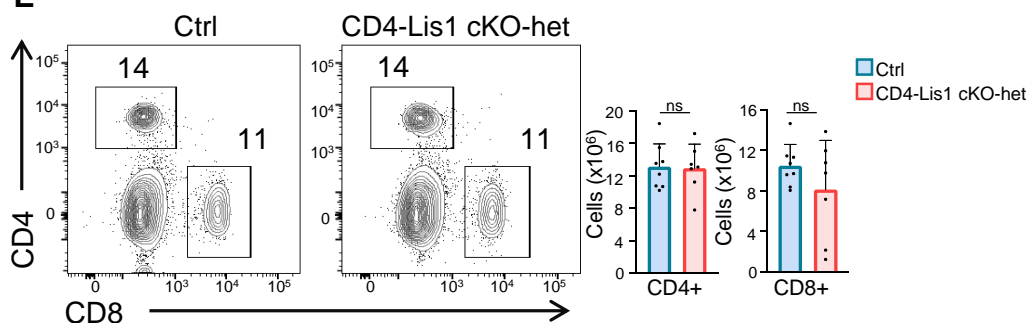

Supplement: supp [file elife_poa_e80277_Figure_3_figure_supplement_1.pdf › elife_poa_e80277_Figure_3_figure_supplement_1.pdf]

**Figure 3 - Figure Supplement 2**

**A**

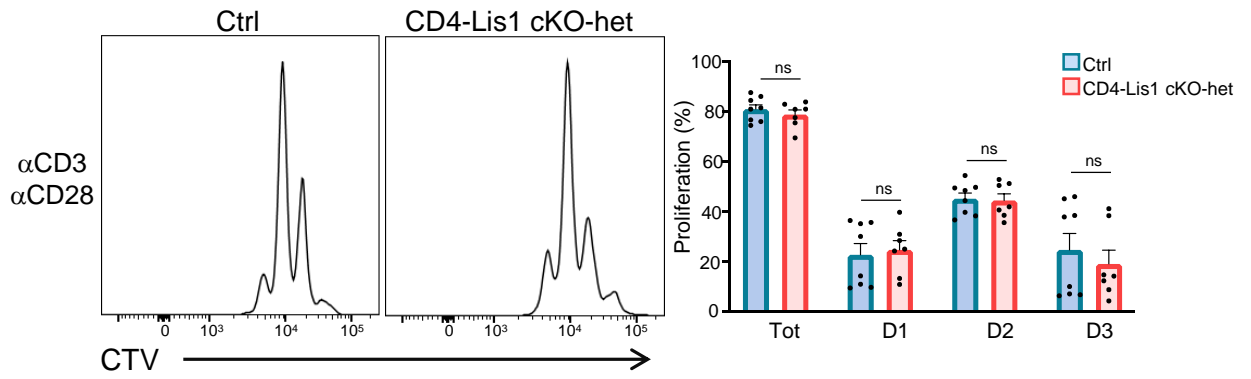

**B**

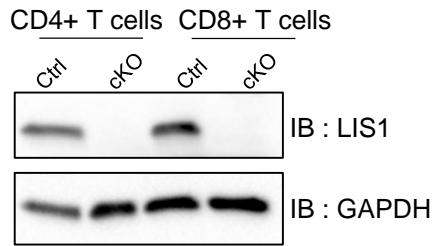

**C**

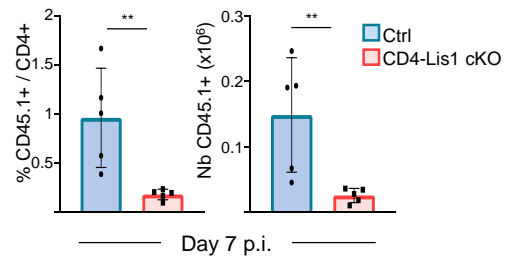

Supplement: supp [file elife_poa_e80277_Figure_3_figure_supplement_2.pdf › elife_poa_e80277_Figure_3_figure_supplement_2.pdf]
